# Supplementary material
Source: PubMed Central journal article supplement (PMC3783610)
Supplement: NIHMS513622-supplement-01.pdf [file NIHMS513622-supplement-01.pdf]

**Figure S1.** The GRN model highlighting the new components and connections identified in this study. The model is essentially identical to that shown in Fig. 3; however, colored gene names and connections were assigned to the newly-introduced genes and interactions only. Previously documented genes or connections were shown in dark gray or black.

**Figure S2.** Temporal and spatial expression analysis of reporter constructs including various upstream regions of the *sip1* gene. A) Diagram illustrating the *sip1* upstream region and reporter constructs. Previously identified transcriptionally active regions (module B, basal, and module D, distal) are included in the 4.3 kb construct. B) Equivalence of 16kb and 4.3kb constructs. The reporter constructs were injected to the embryos and analyzed with QPCR to measure the transcription levels. C), Correct spatial expression of entire 16KB construct and of construct containing only modules B and D. D) Statistical results on spatial expression of GFP cis-regulatory reporter constructs. Both the 16kb construct and the “minimum” construct consisting of the D and B modules were able to drive correct ectodermal expression during the blastula stage.

**Figure S3.** Sequence of *sip1* distal module D. Predicted *otx*-binding sites and the 5' ends of m6.3 and m6.4 construct are marked.

**Figure S4.** Global evaluation of perturbation effects by NanoString transcript quantification following treatment with *sip1* MASO. RNA from treated embryos was extracted at 15h and 18h and quantified using the NanoString nCounter regulatory gene code set. Normalized counts from perturbed embryos were plotted against those of control embryos. Several ectodermal genes are highlighted in blue. Dotted lines indicate a 2-fold change threshold. Open gray circles indicate transcripts present at  $\leq 25$  transcripts or less per embryo; absolute transcript levels were estimated from prior measurements (Materna et al., 2010).

**Figure S5.** Expression territories of *nodal*, *gsc*, and *foxd* in the oral ectoderm. While *foxd* is initially expressed in the oral ectoderm as is *gsc* during blastula stage, it becomes a ciliary band gene as gastrulation occurs. lv—lateral view; vv—vegetal view; oev—oral ectoderm view. In the embryos shown in lv and vv, the oral ectoderm is on the left side. *one-cut* was used as a ciliary-band marker in the double WMISHs, as indicated.

**Figure S6.** Nodal signaling control of stomodeal *bra* expression. Blocking Nodal signaling with the receptor kinase inhibitor, SB-431542 resulted in loss of ectodermal *bra* expression. In contrast, elevating *nodal* expression by Lefty-MASO injection caused *bra* expression to expand to the whole ectoderm.

**Figure S7.** Spatial expression of lateral/CB genes A) Normal expression of *univin*; B) Expression of *one-cut*; left, control; right, *nodal* MASO.

**Table S1.** Graphic representation of ectodermal gene expression pattern.

**Table S2.** PCR primers to generate truncation, fusion, and mutation reporter constructs.

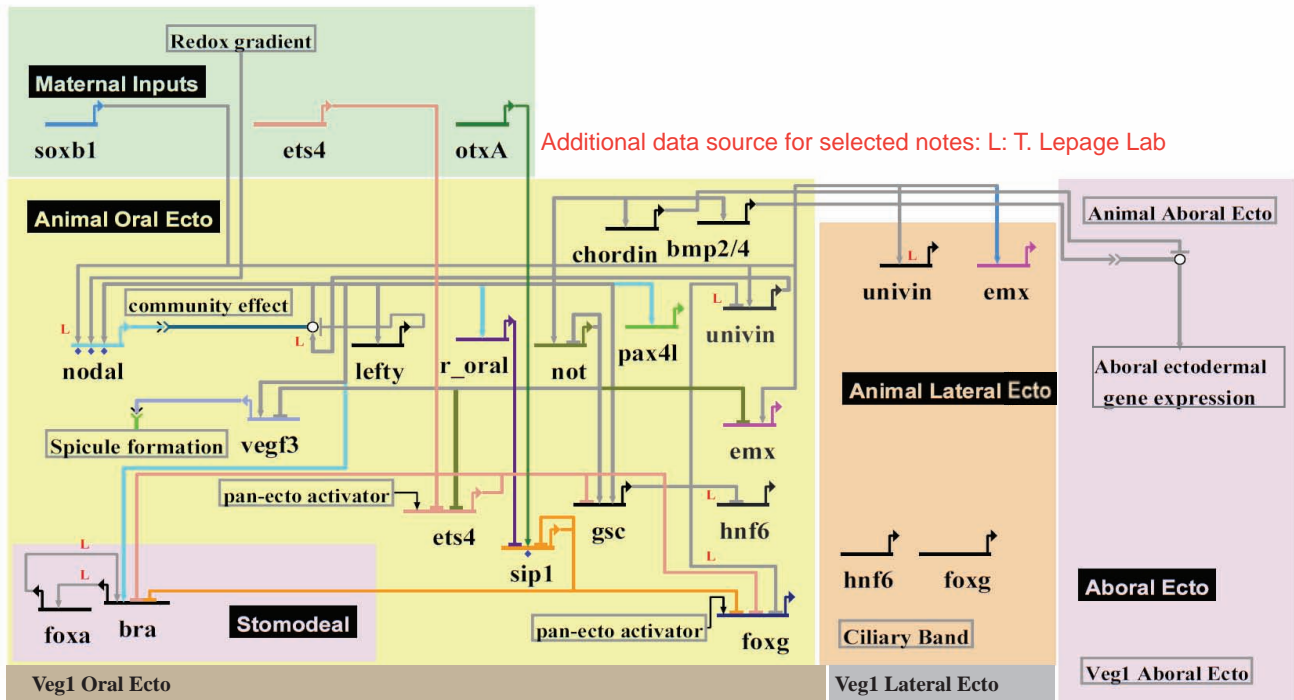

Fig. S1



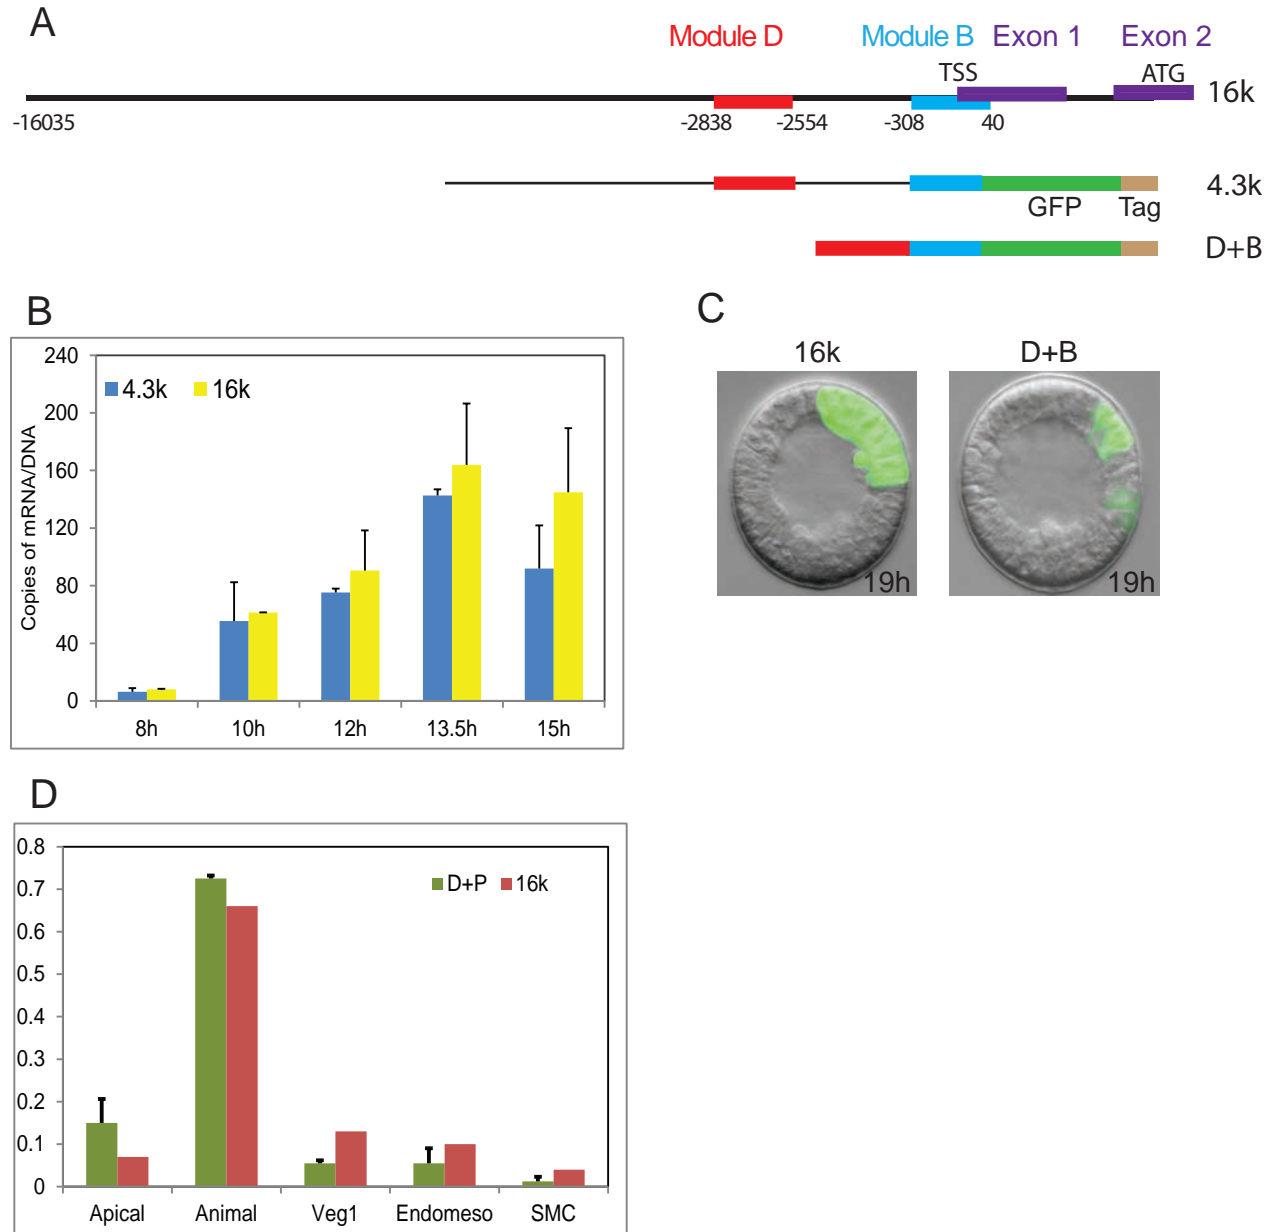

Fig. S2

[5' of m6.3 construct  
-2838) CACTCTTGGCCATCGTGATAATAATTTTGTA AACGCCCTTTGCGTG  
GTATTTTCCTGGGGGTGTTTGTTCCTTGTCCCTATTCAATCAACAC**Otx****TAATCCC**  
[5' of m6.4 construct  
TCTGTCCATGATCAGACACCTGCCACTCAGTGGGGTCAATTAAAATCTTGATT  
ACCTCCTTGAAATCATTAGTCAC**Otx****TAATCT**CATAC**Otx****TAATCC**CCAATATTGGGGA  
ACAATAATTGGTACAGACTCAACAGTTAAATACATGCATTTA ( -2591

Fig. S3

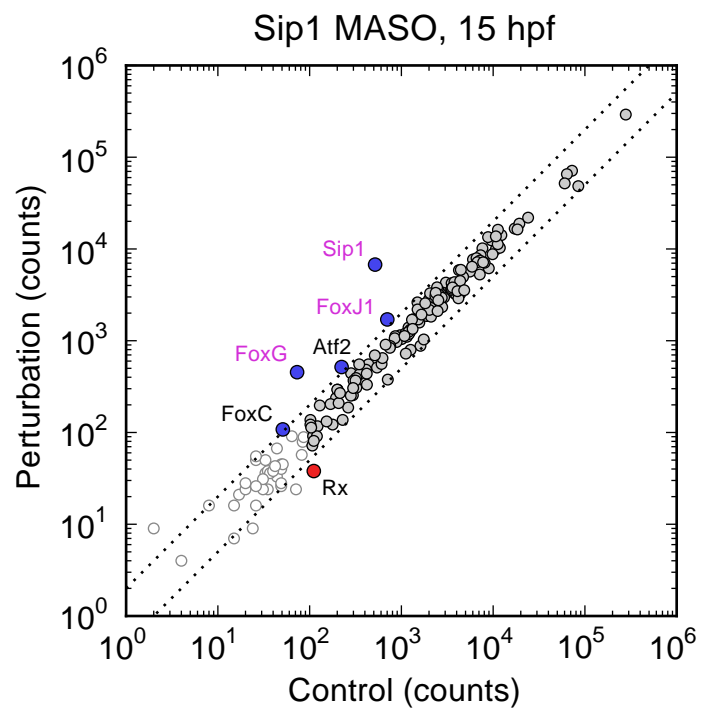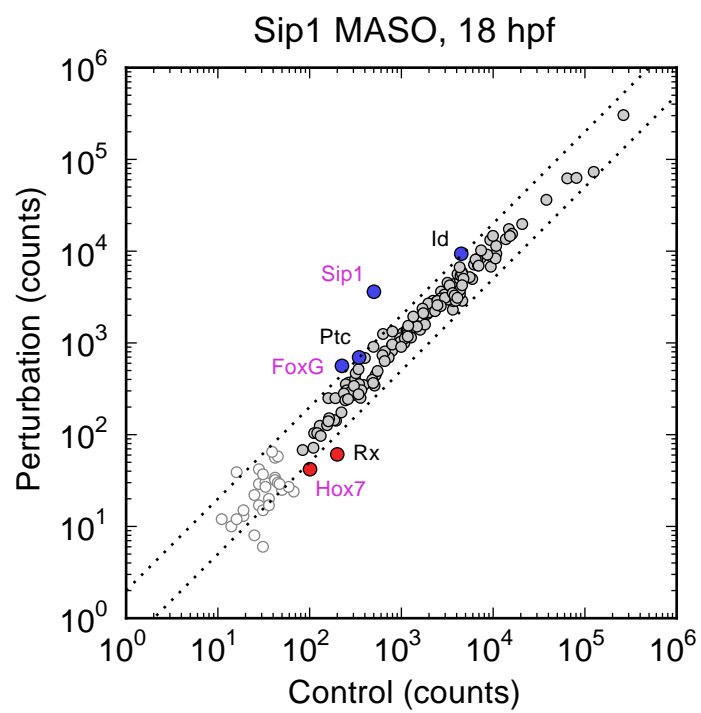

Fig. S4

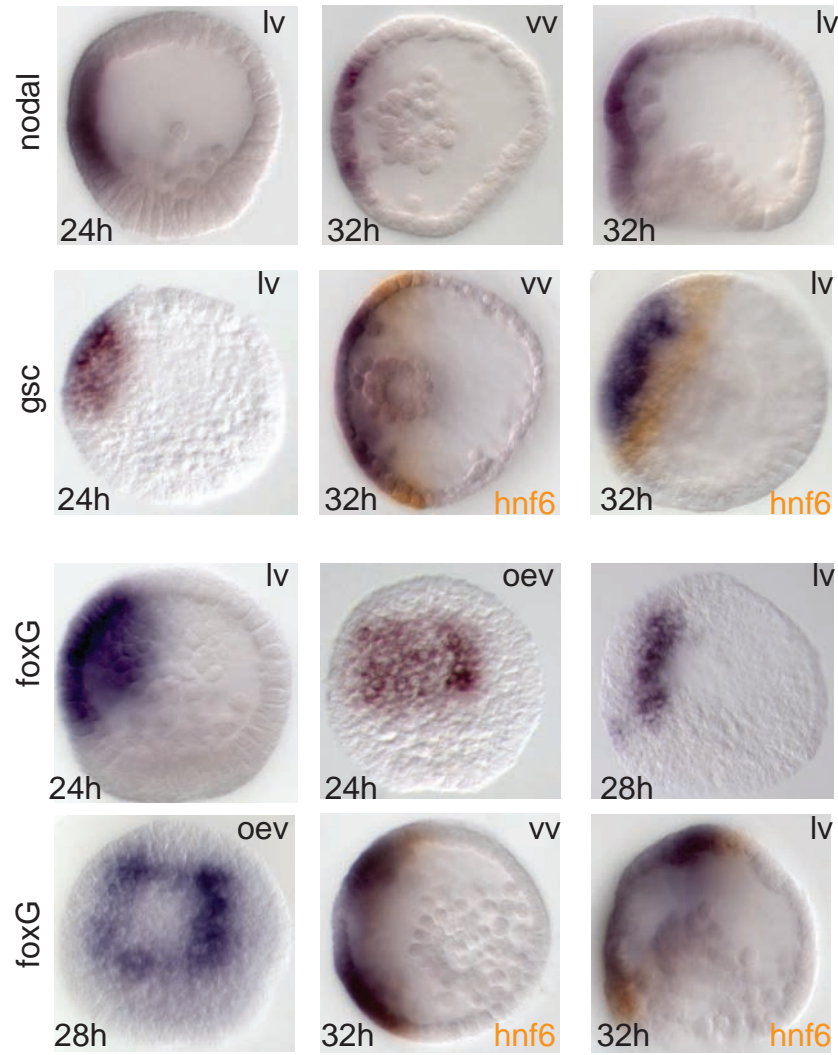

Fig. S5

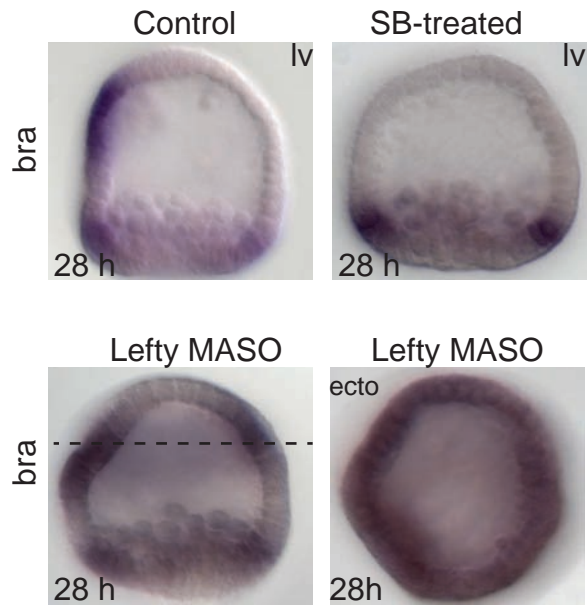

Fig. S6

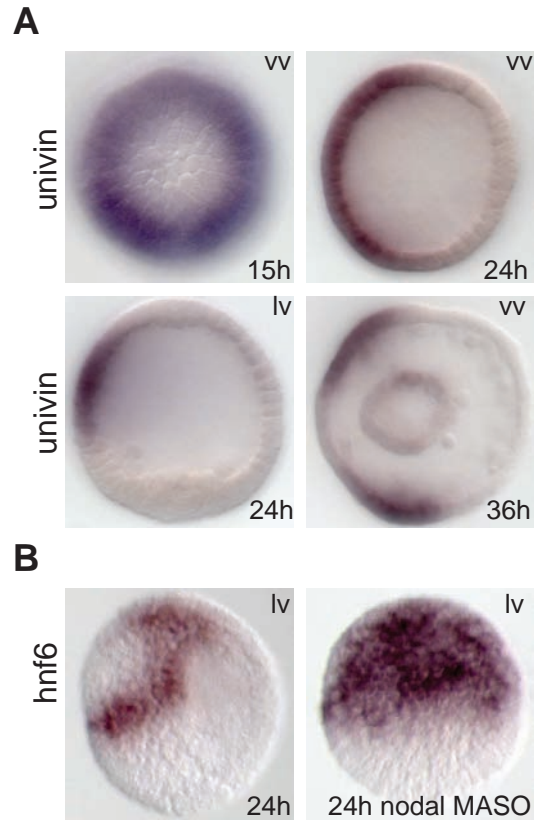

Fig. S7

**Table S1** Graphic representation of ectodermal gene expression pattern

| Gene  | Spatial expression pattern                                                          |                                                                                     |                                                                                       |
|-------|-------------------------------------------------------------------------------------|-------------------------------------------------------------------------------------|---------------------------------------------------------------------------------------|
|       | 12h                                                                                 | 18h                                                                                 | 24h                                                                                   |
| ets4  |    |    |    |
| sip1  |    |    |    |
| emx   |    |    |    |
| nodal |   |   |   |
| not   |  |  |  |
| pax4l |  |  |  |
| gsc   |  |  |  |
| foxg  |  |  |  |
| bra   |  |  |  |

**Table S2.** PCR primers to generate truncation, fusion, and mutation reporter constructs

| Primer                 | Sequence                                       |
|------------------------|------------------------------------------------|
| Sip1-m6.1-5'           | CCTGTTCTTTATGGGAGTGTGA                         |
| Sip1-m6.2-5'           | TCTCTATCAAGGATGTGTTACAGGA                      |
| Sip1-m6.3-5'           | CACTCTTGGCCATCGTGATA                           |
| Sip1-m6.4-5'           | GATCAGACACCTGCCACTCA                           |
| Sip1-m6.5-5'           | CCTGAAATGACAAAGGTCCA                           |
| Sip1-m6.6-5'           | CGTGCATGGTGAAC TTTGAA                          |
| Sip1-m6.7-5'           | CTCCACCGATAGGCAATCAT                           |
| Sip1-m7.5(Module B)-5' | GGTGGGACACAGAGAAAGGA                           |
| Module D-5'            | GGTGT TTTGTTCCCTTGTCTT                         |
| Sip1/GFP-fusion        | TTCCTCGCCCTTGCTCAT TCCACAGCTTCAAATCCAAA        |
| Module-D/B-fusion      | AACTCCTTTCTCTGTGTCCCACCCCTGTATCTCCGATTGTCTAACG |
| Sip1-Otx-M1-5'         | CTACTTTAATGGCCGCCGAGTTCAAGGTGCGTG              |
| Sip1-Otx-M1-3'         | CACGCACCTTGAAC TCGGCGGCCATTAAAGTAG             |
| Sip1-Otx-23del-5'      | CTTGAAATCATTAGTCACCCAATATTGGGGAAC              |
| Sip1-Otx-23del-3'      | GTTCCCAATATTGGGTGACTAATGATTTCAAG               |
